# Supplementary material for: A Novel Self-Assembled Graphene-Based Flame Retardant: Synthesis and Flame Retardant Performance in PLA
Source: MDPI journal article supplement (doi:10.3390/polym13234216), 2021-12-01
Supplement: s1 [file s1]

## **Supplementary Materials**

### **A novel self-assembled graphene-based flame retardant: synthesis and flame retardant performance in PLA**

*Peixin Yang , Hanguang Wu\*, Feifei, Yang, Jie Yang, Rui Wang and Zhiguo Zhu\**

((Optional Dedication))

P. X. Yang, Dr H. G. Wu, F. F. Yang, X. J. Yang, Prof. R. Wang, Prof. Z. G. Zhu

School Materials Design and Engineering, Beijing Institute of Fashion Technology,  
100029, Beijing, China

Beijing Key Laboratory of Clothing Materials R & D and Assessment, Beijing Institute  
of Fashion Technology, 100029, Beijing, China

### **Table of contents**

1. Supplementary Tables
2. Supplementary Figures

## Supplementary Tables

**Table S1** Compositions of flame-retarded PMrG

| Sample | rGO (g) | Melamine (g) | PA (g) |
|--------|---------|--------------|--------|
| PMrG-1 | 1       | 0.5          | 2.5    |
| PMrG-2 | 1       | 0.8          | 4      |
| PMrG-3 | 1       | 1            | 5      |
| PMrG-4 | 1       | 2            | 10     |
| PMrG-5 | 1       | 5            | 25     |

**Table S2** TGA data of rGO, PM, and PMrG-3

| Sample | $T_{5\%}$ (°C) | $T_{\max}$ (°C) | RW (wt%) |
|--------|----------------|-----------------|----------|
| rGO    | 243.0          | 433.8           | 38.4     |
| PM     | 209.9          | 255.8           | 38.1     |
| PMrG-3 | 214.3          | 384.1           | 45.0     |

**Table S3** TGA data of PLA and its composites.

| Sample     | $T_{5\%}$ (°C) | $T_{\max}$ (°C) | RW (%) |
|------------|----------------|-----------------|--------|
| PLA        | 321.1          | 357.6           | 0      |
| rGO/PLA    | 338.6          | 367.5           | 7.8    |
| PM/PLA     | 319.1          | 368.4           | 4.2    |
| PMrG-1/PLA | 327.3          | 370.3           | 2.7    |
| PMrG-2/PLA | 325.1          | 364.6           | 4.1    |
| PMrG-3/PLA | 323.5          | 370.1           | 6.3    |
| PMrG-4/PLA | 327.4          | 369.4           | 5.5    |
| PMrG-5/PLA | 330.1          | 368.9           | 1.9    |

**Table S4** LOI and UL-94 test results of the pure PLA and the PMrG/PLA composites with different PMrG composition

| Sample     | LOI (%) | UL-94 rating |
|------------|---------|--------------|
| PLA        | 19      | No rating    |
| rGO/PLA    | 22      | V-1          |
| PM/PLA     | 23      | No rating    |
| PMrG-1/PLA | 23      | V-2          |
| PMrG-2/PLA | 24      | V-1          |
| PMrG-3/PLA | 25      | V-0          |
| PMrG-4/PLA | 25      | V-0          |
| PMrG-5/PLA | 24      | V-1          |

**Table S5** Cone calorimeter data of PMrG/PLA composites

| Sample     | TTI(s) | pHRR(Kw/m <sup>2</sup> ) | THR(MJ/m <sup>2</sup> ) | TSR(m <sup>2</sup> /m <sup>2</sup> ) | Char residue (%) |
|------------|--------|--------------------------|-------------------------|--------------------------------------|------------------|
| PMrG-1/PLA | 46     | 317.8                    | 53.3                    | 400.3                                | 6.0              |
| PMrG-2/PLA | 51     | 283.5                    | 52.1                    | 310.1                                | 9.2              |
| PMrG-3/PLA | 59     | 276.1                    | 46.5                    | 191.5                                | 15.3             |
| PMrG-4/PLA | 55     | 277.6                    | 47.4                    | 262.6                                | 9.3              |
| PMrG-5/PLA | 52     | 298.8                    | 53.4                    | 383.7                                | 6.6              |

## 2. Supplementary Figures

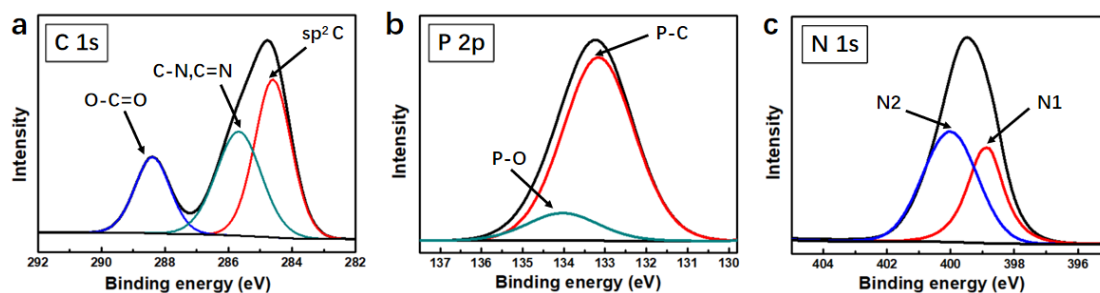

**Figure S1** High-resolution XPS spectra for (a) C 1s, (b) N 1s, and (c) P 2p.

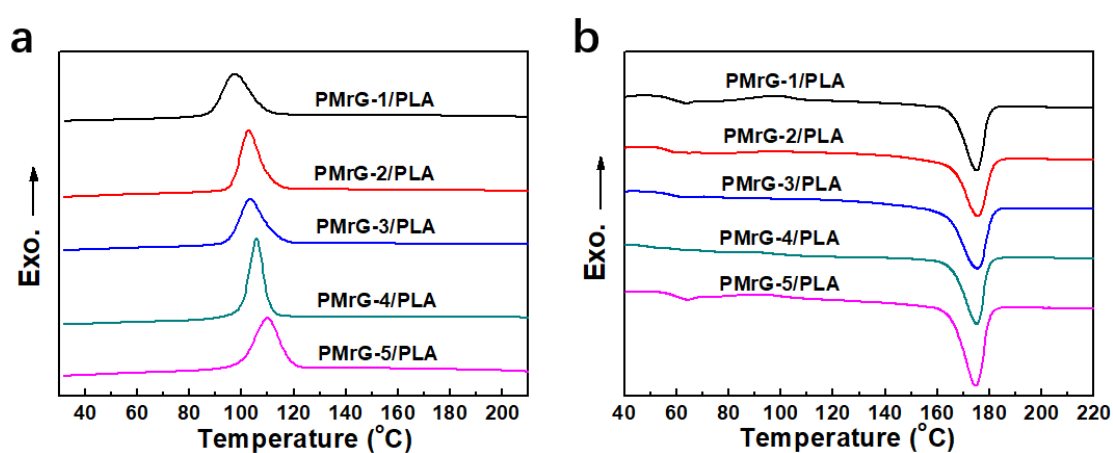

**Figure S2** DSC curves of PMrG/PLA compositions with different compositions during the (a) cooling and (b) heating process (the mass fractions of the additives in the composites are all 10%).

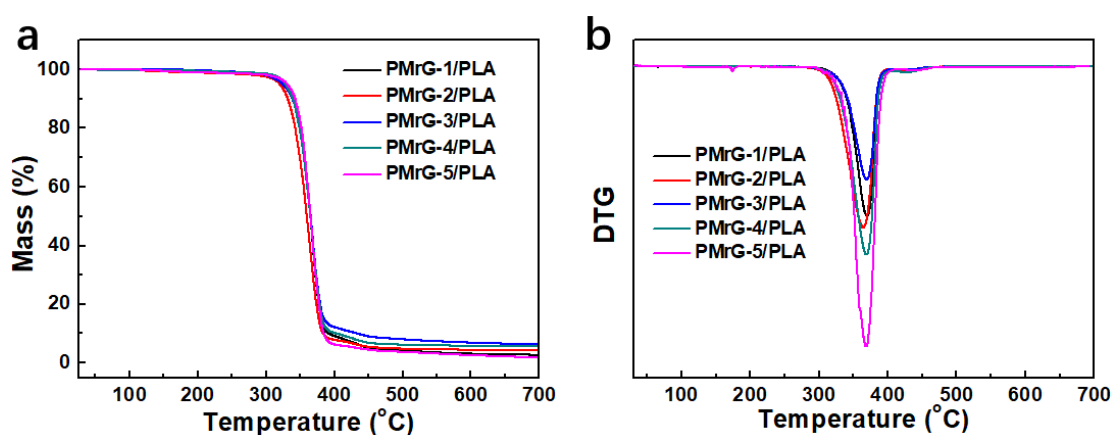

**Figure S3** (a) TGA and (b) DTG curves of the PMrG/PLA composites with different PMrG compositions (the mass fractions of the additives in the composites are all 10%).

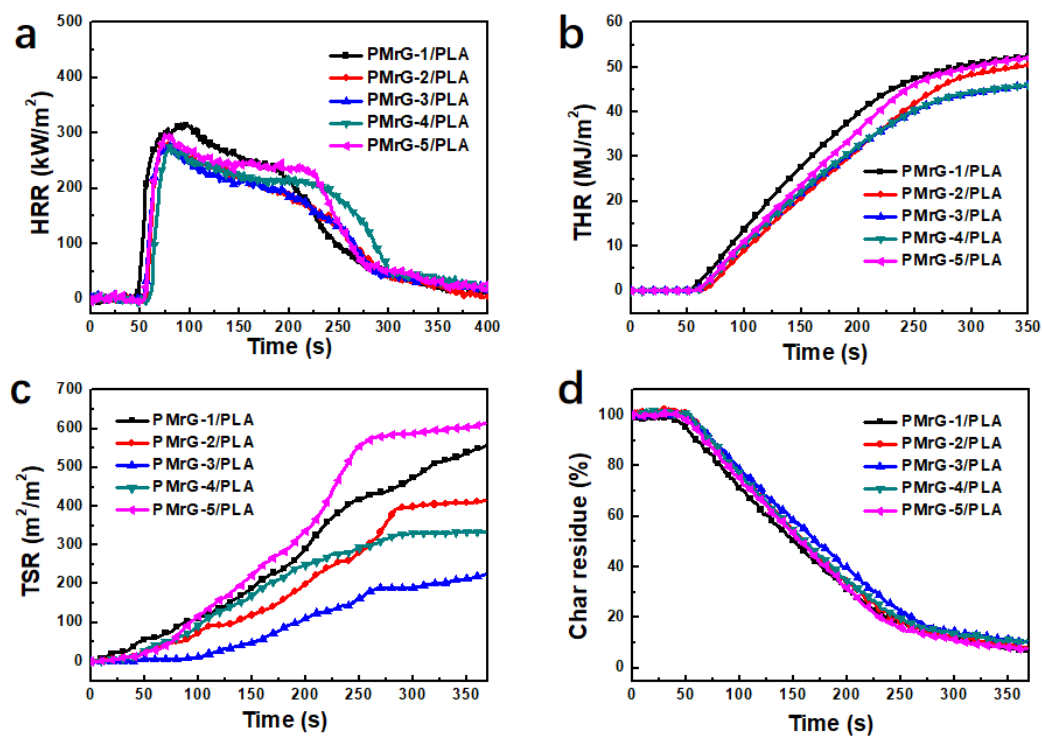

**Figure S4** (a) Heat release rate, (b) Total heat release, (c) Total smoke release, and (d) Char residue curves of PMrG/PLA composites with different PMrG compositions (the mass fractions of PMrG in the composites are all 10%).
